# Supplementary material for: Prevalence of Overweight and Obesity in France: The 2020 Obepi-Roche Study by the “Ligue Contre l’Obésité”
Source: MDPI journal article supplement (doi:10.3390/jcm12030925), 2023-01-25
Supplement: s1 [file s1]

## Questionnaire Obepi

*Adults*

### Questionnaire addressed to 18 years and +

#### **I. Questionnaire TNS 2012 adapted**

- Explanatory note on the measures

#### **Could you indicate...**

**Q1. Your current height (measured today)**

Numerical response in cm

**Q2. Your current weight (measured today)**

Numerical response in kg

**Q3. Your waist circumference (measured today)**

Numerical response in cm

#### **Body shape**

**Q4. Which body shape do you think is closest to yours?**

**Q5. What is your ideal body shape?**

**(TO WOMEN)**

**Q6. Are you currently pregnant or have you given birth in the last 3 months?**

- Yes
- No

**Q7. Currently, do you smoke?**

- Yes
- No, you stopped smoking
- No, you never smoked

*[To those who have quit smoking]*

**Q8. Has quitting smoking caused weight gain?**

- Yes
- No

**Q9. Are you currently being treated or have you been treated for...**

**(several possible answers)**

High blood pressure (or hypertension)

Diabetes

Cancer

Sleep apnea syndrome

Osteoarthritis  
Depression or psychological disorders  
High cholesterol  
Cardiovascular pathology (stroke or infarction)  
Gastroesophageal reflux disease (GERD) or heartburn

- You are currently being treated
- You have been treated
- No

**Q10. Have you had surgery to treat a weight problem with gastric band, bypass (short circuit) or sleeve? (Several possible answers - except "no" -)**

- Gastric band
- Bypass
- Sleeve
- Other
- No

*[If a surgery in Q10]*

**Q11. When did you have this operation?**

*(specify the month (optional) and the year)*

N.B. : If you have had more than one, please specify the month and year of the last surgery

Numerical answer type XX/XXXX

**Q12. In the last 12 months, have you consulted a physician for a weight problem?**

- Yes
- No

**Q13. In your household, would you rather say that, financially speaking? (one possible answer)**

- You are comfortable/it's okay
- It's tight
- You can hardly manage
- You can't manage without going into debt

## **II. Questions COVID 19**

### **COVID19**

**Q14. Regarding the Covid-19 virus, have you been confronted with any of the following situations: (several possible answers)**

- You think you have had COVID-19
- You have been diagnosed positive with COVID-19
- You have been hospitalized for COVID-19
- You went to intensive care for COVID-19

- Nothing of the sort

### III. Questions about discrimination

#### **Q15. Have you ever experienced or are you experiencing discrimination?**

1. Yes, you have experienced discrimination
2. Yes, you are currently experiencing discrimination
3. No

[If "yes currently", i.e. item 2 in Q15]

#### **Q16. How often do you experience discrimination?**

- Everyday
- At least twice a week
- At least once a week
- At least once per month
- Some times per year
- Less often

[If 2 in Q15]

#### **Q17. And what types of discrimination do you encounter? Discrimination...**

##### **(Several possible answers)**

- In the medical field
- In the educational and/or professional field
- Inside the family
- In the public space

### IV. Questions « Regions »

#### **Q18. In your opinion, are the following infrastructures sufficiently accessible to people with large sizes?**

Public transportation  
Colleges  
Universities  
Sports and physical activity equipments  
Cultural places  
Bars et restaurants

- Yes
- No

#### **Q19. Do you think that local products are a guarantee of better food?**

- Yes, certainly
- Yes, probably
- No, probably not
- No, certainly not

**Q20. Of the themes below, what do you think should be the main concern for our country in the coming months?**

- Employment
- Purchasing power
- Education
- Environment
- Health
- Security
